# Supplementary material for: Continuously efficient hydrodeoxygenation of glycerol into 1,3-propanediol over Pt/WOx/beta catalysts
Source: Royal Society of Chemistry journal article supplement (doi:10.1039/d1se00098e), 2021-01-01
Supplement: d1se00098e1.pdf [file d1se00098e1.pdf]

## Supporting Information

### Continuously Efficient Hydrodeoxygenation of Glycerol into 1,3-propandiol over Pt/WO<sub>x</sub>/Beta Catalysts

Lijun Zhu <sup>a,b,ξ</sup>, Mengya Sun <sup>a,b,ξ</sup>, Xinpeng Zhao <sup>a,b</sup>, Yanfei Zhang <sup>a,b</sup>, Hu Luo <sup>a</sup>, Wang Liu <sup>a,b</sup>, Gai Miao <sup>a,\*</sup>,  
Lingzhao Kong <sup>a,b\*</sup>

<sup>a</sup> Laboratory of Low-Carbon Conversion Science and Engineering, Shanghai Advanced Research Institute, CAS. No. 100 Haik Road, Shanghai, China.

<sup>b</sup> University of Chinese Academy of Sciences, Beijing 100049, PR China.

**\*Corresponding author:**

Dr. Gai Miao, E-mail: miaog@sari.ac.cn; Prof/Dr. Lingzhao Kong, E-mail: konglz@sari.ac.cn

Address: No.99 Haik Road, Zhangjiang Hi-Tech Park, Pudong Shanghai, PR China.

<sup>ξ</sup> These two authors contribute equally.

## For the calculation of mass transfer limitations based on Weisz-Prater and Mears criteria

The effects of mass transfer limitations on HDO of glycerol into 1,3-propandiol were evaluated by Mears criteria ( $C_M$ ) and Weisz-Prater ( $C_{WP}$ ) [1-2]. The detailed calculations are presented:

$$C_M = \frac{-r'_A \rho_b R_p n}{k_c C_{Ab}} \ll 0.15$$

$$C_{WP} = \frac{-r'_A \rho_c R_p^2}{D_{eA} C_{As}} \ll 1$$

Where  $-r'_A$  is the observed reaction rate ( $\text{kmol}\cdot\text{kg}^{-1}\cdot\text{s}^{-1}$ );  $R_p$  is the catalyst particle radius (m);  $\rho_b$  is the bulk density of catalyst bed ( $\text{kg}\cdot\text{m}^{-3}$ ),  $\rho_b = (1-\varepsilon)\rho_c$ ;  $\rho_c$  is the solid catalyst density ( $\text{kg}\cdot\text{m}^{-3}$ );  $\varepsilon$  is the catalyst porosity;  $C_{Ab}$  is the bulk concentration of glycerol ( $\text{kmol}\cdot\text{m}^{-3}$ );  $k_c$  is the mass transfer coefficient of glycerol in the liquid phase ( $\text{m}\cdot\text{s}^{-1}$ );  $n$  is the reaction order;  $C_{As}$  is the bulk concentration of glycerol at the external surface of the catalyst ( $\text{kmol}\cdot\text{m}^{-3}$ );  $D_{eA}$  is the effective diffusivity of glycerol ( $\text{m}^2\cdot\text{s}^{-1}$ ).

The parameters were computed using reaction conditions of 160 °C, 4.0 MPa, and WHSV 1.0  $\text{h}^{-1}$ .

$k_c$  was calculated using Eqs. (S1) to (S4).

$$k_c = \frac{D_{AB} Sh}{d_p} \quad (\text{S1})$$

$$Sh = 2 + 0.6 Re_p^{1/2} Sc^{1/3} \quad (\text{S2})$$

$$Re_p = \frac{d_p u \rho_f}{\mu} \quad (\text{S3})$$

$$Sc = \frac{\mu}{\rho_f D_{AB}} \quad (\text{S4})$$

where  $Sh$  is the Sherwood number;  $d_p$  is the particle diameter (m);  $\rho_f$  is the fluid density ( $\text{kg}\cdot\text{m}^{-3}$ );  $\mu$  is the viscosity of glycerol ( $\text{Pa}\cdot\text{s}$ );  $(Re)_p$  is the Reynolds number considering the diameter of the particle;  $u$  is the linear velocity in pores;  $Sc$  is the Schmidt number;  $D_{AB}$  is diffusion coefficient.

For the Pt/WO<sub>x</sub>/Beta catalyst,

$$d_p = 3.75 \times 10^{-4} \text{ m}$$

$$R_p = 1.875 \times 10^{-4} \text{ m}$$

$$n = 0.827$$

$$\varepsilon = 0.375$$

$$-r'_A = k C^{0.827} = 2.216 \times 10^{-4} \text{ mol}^{0.173} \text{ L}^{0.827} \text{ h}^{-1} \text{ g}^{-1} \times (5.3763 \text{ mol}\cdot\text{L}^{-1})^{0.827} = 2.4 \text{ s}^{-1}$$

$$\rho_b = 600 \text{ kg}\cdot\text{m}^{-3}$$

$$\rho_c = 960 \text{ kg}\cdot\text{m}^{-3}$$

$$C_{As} = C_{Ab} = 500 \text{ g}\cdot\text{L}^{-1} = 5.4295 \text{ mol}\cdot\text{L}^{-1} = 5.4295 \text{ kmol}\cdot\text{m}^{-3}$$

$$\rho_f = 1.1035 \times 10^3 \text{ kg}\cdot\text{m}^{-3}$$

$$\mu = 1.748 \times 10^{-12} e^{\frac{8056}{273.15 + 160}} = 0.209 \times 10^{-3} \text{ Pa} \cdot \text{s} = 0.209 \times 10^{-3} \text{ kg} \cdot \text{m}^{-3}$$

$$d_p = 3.75 \times 10^{-4} \text{ m}$$

$$u = 2.8313 \times 10^{-5} \text{ m} \cdot \text{s}^{-1}$$

$$\tau = 3$$

$$D_A \approx D_{AB} = 3.5034 \times 10^{-8} \text{ m}^2 \cdot \text{s}^{-1}$$

$$D_{eA} = \frac{D_A \varepsilon}{\tau} = \frac{3.5034 \times 10^{-8} \times 0.375}{3} = 3.8168 \times 10^{-9} \text{ m}^2 \cdot \text{s}^{-1} \quad ; \text{ where } \tau \text{ is the catalyst tortuosity.}$$

the reactor inner diameter:  $1.5 \times 10^{-2} \text{ m}$

$$Sc = \frac{\mu}{\rho_f D_{AB}} = \frac{0.209 \times 10^{-3} \text{ kg} \cdot \text{m}^{-1} \cdot \text{s}^{-1}}{1.1035 \times 10^3 \text{ kg} \cdot \text{m}^{-3} \times 3.5034 \times 10^{-8} \text{ m}^2 \cdot \text{s}^{-1}} = 5.406$$

$$Re_p = \frac{d_p u \rho_f}{\mu} = \frac{3.75 \times 10^{-4} \text{ m} \times 2.8313 \times 10^{-5} \text{ m} \cdot \text{s}^{-1} \times 1.1035 \times 10^3 \text{ kg} \cdot \text{m}^{-3}}{0.209 \times 10^{-3} \text{ kg} \cdot \text{m}^{-1} \cdot \text{s}^{-1}} = 0.0561$$

$$Sh = 2 + 0.6 Re_p^{1/2} Sc^{1/3} = 2 + 0.6 \times (0.0561)^{1/2} \times (5.406)^{1/3} = 2.2494$$

$$k_c = \frac{D_{AB} Sh}{d_p} = \frac{3.5034 \times 10^{-8} \text{ m}^2 \cdot \text{s}^{-1} \times 2.2494}{3.75 \times 10^{-4} \text{ m}} = 2.1015 \times 10^{-4} \text{ m} \cdot \text{s}^{-1}$$

$C_M$

$$= \frac{-r'_A \rho_b R_p n}{k_c C_{Ab}} = \frac{2.474 \times 10^{-7} \text{ kmol} \cdot \text{kg}^{-1} \cdot \text{s}^{-1} \times 600 \text{ kg} \cdot \text{m}^{-3} \times 1.875 \times 10^{-4} \text{ m}}{2.1015 \times 10^{-4} \text{ m} \cdot \text{s}^{-1} \times 5.3763 \text{ kmol} \cdot \text{m}^{-3}} \ll 0.15$$

$C_{WP}$

$$= \frac{-r'_A \rho_c R_p^2}{D_{eA} C_{As}} = \frac{2.474 \times 10^{-7} \text{ kmol} \cdot \text{kg}^{-1} \cdot \text{s}^{-1} \times 960 \text{ kg} \cdot \text{m}^{-3} \times (1.875 \times 10^{-4} \text{ m})^2}{3.8168 \times 10^{-9} \text{ m}^2 \cdot \text{s}^{-1} \times 5.4295 \text{ kmol} \cdot \text{m}^{-3}}$$

Therefore, the mass transfer limitations can be neglected.

The effects of heat transfer limitations on HDO of glycerol into 1,3-propanediol were evaluated by Mears criteria ( $C_H$ ). The detailed calculations are presented:

$$C_H = \frac{-r'_A |\Delta H_r^0| \rho_b R_p E_A}{h R_g T_b^2} \ll 0.15$$

Where  $-r'_A$  is the observed reaction rate ( $\text{kmol} \cdot \text{kg}^{-1} \cdot \text{s}^{-1}$ );  $\Delta H_r$  is the reaction enthalpy,  $h$  is the heat transfer coefficient;  $R_p$  is the catalyst particle radius (m);  $R_g$  is the universal gas constant ( $8.314 \text{ J} \cdot \text{mol}^{-1} \cdot \text{K}^{-1}$ );  $\rho_b$  is the bulk density of catalyst bed ( $\text{kg} \cdot \text{m}^{-3}$ ),  $E_A$  is the activation energy ( $\text{kJ} \cdot \text{mol}^{-1}$ );  $T_b$  is the bulk fluid temperature (K).

$$\rho_b = 600 \text{ kg} \cdot \text{m}^{-3}$$

$$R_g = 8.314 \text{ J} \cdot \text{mol}^{-1} \cdot \text{K}^{-1}$$

$$R_p = 1.875 \times 10^{-4} \text{ m}$$

$$-r'_A = k C^{0.827} = 2.474 \times 10^{-4} \text{ mol} \cdot \text{kg}^{-1} \cdot \text{s}^{-1}$$

$$T_b = 160 + 273.15 = 433.15 \text{ K}$$

$$E_A = 51.688 \text{ kJ} \cdot \text{mol}^{-1}$$

$$\Delta H_r^0 = -101.64 \text{ kJ} \cdot \text{mol}^{-1}$$

$$\text{For the catalyst bed, } h = 61.2 \sim 320 \text{ kJ} \cdot \text{m}^{-2} \cdot \text{h}^{-1} \cdot \text{K}^{-1} = 0.017 \sim 0.089 \text{ kJ} \cdot \text{m}^{-2} \cdot \text{s}^{-1} \cdot \text{K}^{-1}$$

$$C_H$$

$$= \frac{2.474 \times 10^{-4} \text{ mol} \cdot \text{kg}^{-1} \text{s}^{-1} \times 101.64 \text{ kJ} \cdot \text{mol}^{-1} \times 600 \text{ kg} \cdot \text{m}^{-3} \times 1.875 \times 10^3 \text{ J} \cdot \text{kg}^{-1} \cdot \text{K}^{-1}}{(0.017 \sim 0.089) \text{ kJ} \cdot \text{m}^{-2} \cdot \text{s}^{-1} \cdot \text{K}^{-1} \times 8.314 \times 10^{-3} \text{ kJ} \cdot \text{mol}^{-1} \cdot \text{K}^{-1}}$$

$$= (1.053 \sim 5.514) \times 10^{-3} \ll 0.15$$

Therefore, the heat transfer limitation can be neglected.

**Table S1** Reaction performance of the synthesized catalyst <sup>a</sup>.

| Entr<br>y | Catalysts                                         | Conversion,<br>% | Selectivity, % |        |         |        |                 |
|-----------|---------------------------------------------------|------------------|----------------|--------|---------|--------|-----------------|
|           |                                                   |                  | 1,3-PDO        | n-PrOH | 1,2-PDO | i-PrOH | C <sub>3-</sub> |
| 1         | 1.5Pt/WO <sub>x</sub> (APT)                       | 1.8              | 19.6           | 23.1   | 12.3    | 8.9    | 36.1            |
| 2         | 1.5Pt/Beta                                        | 3.8              | 23.6           | 28.2   | 5.9     | 3.2    | 39.1            |
| 3         | 1.5Pt/0.5W(APT)/Beta                              | 40.5             | 43.5           | 23.6   | 1.1     | 2.6    | 29.2            |
| 4         | 1.5Pt/0.5W(APT)/ZSM-5                             | 16.4             | 41.2           | 21.3   | 1.2     | 4.3    | 32.0            |
| 5         | 1.5Pt/0.5W(APT)/USY                               | 16.5             | 45.4           | 26.8   | 11.4    | 8.3    | 8.1             |
| 6         | 1.5Pt/0.5W(APT)/HY                                | 7.92             | 48.4           | 20.7   | 8.6     | 4.3    | 18.0            |
| 7         | 1.5Pt/0.5W(WCl <sub>6</sub> )/Beta                | 36.1             | 35.7           | 25.1   | 2.1     | 2.3    | 34.8            |
| 8         | 1.5Pt/0.5W(Na <sub>2</sub> WO <sub>4</sub> )/Beta | 28.3             | 36.7           | 19.6   | 2.0     | 3.5    | 38.2            |
| 9         | 1.5Pt/0.5W(AMT)/Beta                              | 37.3             | 34.1           | 24.2   | 2.0     | 2.8    | 36.9            |
| 10        | 1.5Pt/0.5W(HSiWO <sub>x</sub> )/Beta              | 28.9             | 36.8           | 25.0   | 1.8     | 2.4    | 34.0            |
| 11        | 1.5Pt/0.1W(APT)/Beta                              | 9.9              | 43.4           | 25.8   | 6.4     | 4.9    | 19.5            |
| 12        | 1.5Pt/0.3W(APT)/Beta                              | 23.6             | 41.9           | 23.8   | 2.2     | 2.6    | 29.5            |
| 13        | 1.5Pt/0.7W(APT)/Beta                              | 31.1             | 38.6           | 30.9   | 2.5     | 2.6    | 25.4            |
| 14        | 1.5Pt/1.0W(APT)/Beta                              | 29.5             | 33.7           | 23.4   | 1.9     | 2.6    | 38.4            |
| 15        | 1.5Pt/1.5W(APT)/Beta                              | 22.8             | 29.7           | 22.7   | 2.6     | 2.6    | 42.4            |
| 16        | 1.5Pt/8.5W(APT)/Beta                              | 5.4              | 27.1           | 29.6   | 6.8     | 7.6    | 28.9            |
| 17        | 0.5Pt/0.5W(APT)/Beta                              | 19.7             | 30.4           | 21.4   | 2.8     | 3.7    | 41.7            |
| 18        | 1.0Pt/0.5W(APT)/Beta                              | 24.6             | 38.1           | 26.1   | 2.1     | 4.6    | 29.1            |
| 19        | 3.0Pt/0.5W(APT)/Beta                              | 26.0             | 37.8           | 28.5   | 3.8     | 5.2    | 24.7            |

<sup>a</sup> Reaction condition: 10 ml of 30 g/L glycerol, 0.2 g catalysts at 160 °C of reaction temperature, 4.0 MPa of initial hydrogen pressure and 3h of reaction time.

C<sub>3-</sub> indicates the total products of C-C breakage in the aqueous products, including ethanol, methanol, and ethylene glycol, etc.

Table S2 Acidic properties of the different supports

| Catalysts             | <sup>a</sup> DT, 100°C  |                         | <sup>a</sup> DT, 200 °C |                         | <sup>a</sup> DT, 350 °C |                         |
|-----------------------|-------------------------|-------------------------|-------------------------|-------------------------|-------------------------|-------------------------|
|                       | n <sub>B</sub> , μmol/g | n <sub>L</sub> , μmol/g | n <sub>B</sub> , μmol/g | n <sub>L</sub> , μmol/g | n <sub>B</sub> , μmol/g | n <sub>L</sub> , μmol/g |
| Beta                  | 180.9                   | 332.7                   | 179.5                   | 152.3                   | 154.7                   | 71.8                    |
| WO <sub>x</sub> (APT) | 0                       | 0.9                     | 0                       | 0                       | 0                       | 0                       |
| WO <sub>x</sub> /Beta | 290.8                   | 57.6                    | 256.6                   | 54.6                    | 178.7                   | 51.6                    |

<sup>a</sup>DT is short for desorption temperature.

**Table S3** Elemental analysis of fresh and used Pt/WO<sub>x</sub>/Beta.

| Catalysts                      | <sup>a</sup> Ratio of W, % | <sup>a</sup> Ratio of Pt, % | <sup>b</sup> Ratio of Al, % | <sup>b</sup> Ratio of Si, % |
|--------------------------------|----------------------------|-----------------------------|-----------------------------|-----------------------------|
| Fesh Pt/WO <sub>x</sub> /Beta  | 0.471                      | 1.497                       | 3.191                       | 40.083                      |
| Spent Pt/WO <sub>x</sub> /Beta | 0.468                      | 1.509                       | 3.028                       | 42.633                      |

<sup>a</sup> W and Pt weight ratio are determined by ICP-AES

<sup>b</sup> Si and Al weight ratio are determined by XRF.

**Table S4** Reaction performance of different substrates over Pt/WO<sub>x</sub>/Beta catalyst <sup>a</sup>

| Entry | Substrates | Conversion,<br>% | Selectivity, % |        |         |        |                 |
|-------|------------|------------------|----------------|--------|---------|--------|-----------------|
|       |            |                  | 1,3-PDO        | n-PrOH | 1,2-PDO | i-PrOH | C <sub>3-</sub> |
| 1     | Glycerol   | 40.5             | 43.5           | 23.6   | 1.1     | 2.6    | 29.2            |
| 2     | 1,2-PDO    | 61.5             | --             | 69.4   | --      | 3.3    | 27.3            |
| 3     | 1,3-PDO    | 4.6              | --             | 71.6   | --      | --     | 28.4            |

<sup>a</sup> Reaction condition: 10 ml of 30 g/L substrates, 0.2 g catalysts at 160 °C of reaction temperature, 4.0 MPa of initial hydrogen pressure and 3 h of reaction time.

C<sub>3-</sub> indicates the total products of C-C breakage in the aqueous products, including ethanol, methanol, and ethylene glycol, etc.



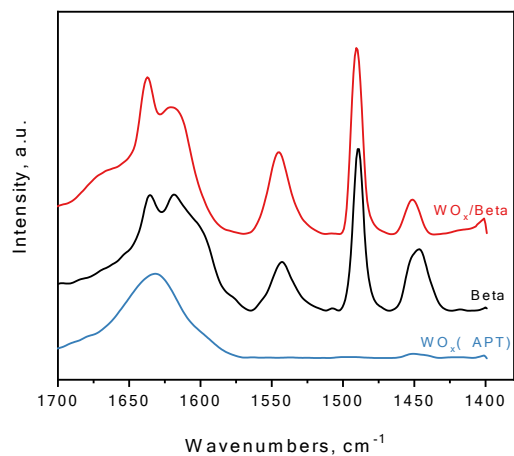

Fig. S1 Infrared Spectroscopy of the different supports after adsorbing pyridine followed by desorption at 200 °C. The pyridine adsorption/desorption in situ infrared study determined the type of acids on the catalyst and the used support shows abundant acid sites containing Brønsted acid (1540  $\text{cm}^{-1}$ ) and Lewis acid (1450  $\text{cm}^{-1}$  and 1612  $\text{cm}^{-1}$ ).

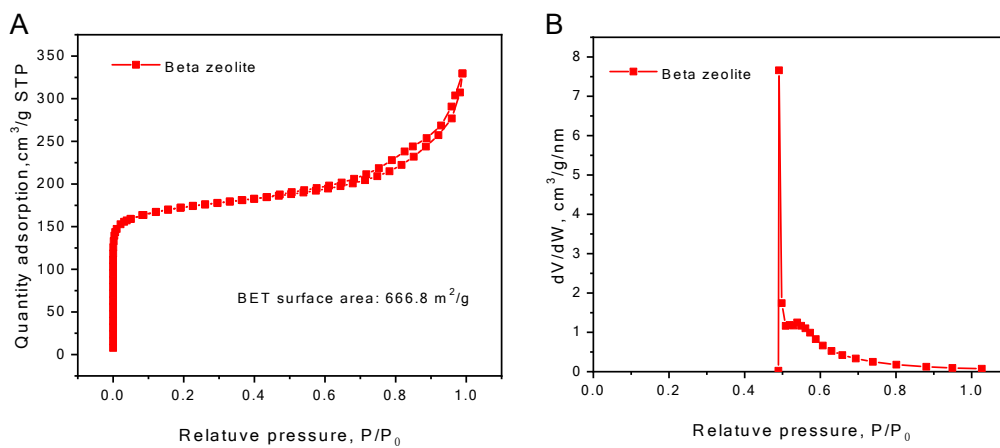

**Fig. S2** A)  $\text{N}_2$  adsorption isotherm linear plot and B) pore diameter distribution of Beta zeolite.

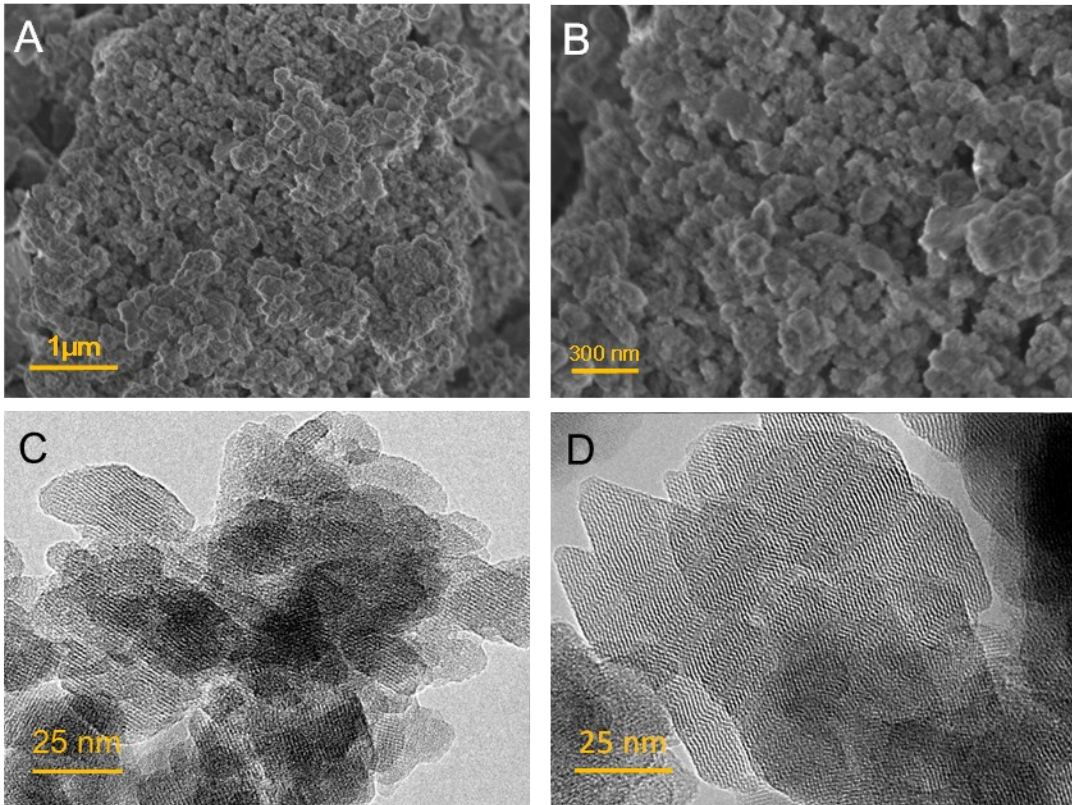

**Fig. S3** SEM (A and B) and TEM (C and D) images of Beta zeolite.

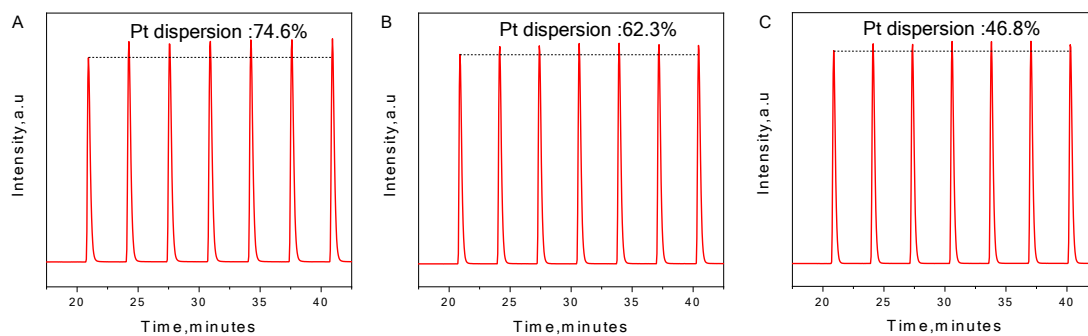

**Fig. S4** CO pulse images of Pt/WO<sub>x</sub>/Beta catalyst with different Pt loading, A) 0.5%Pt/WO<sub>x</sub>/Beta, B) 1.5%Pt/WO<sub>x</sub>/Beta, C) 3.0%Pt/WO<sub>x</sub>/Beta.



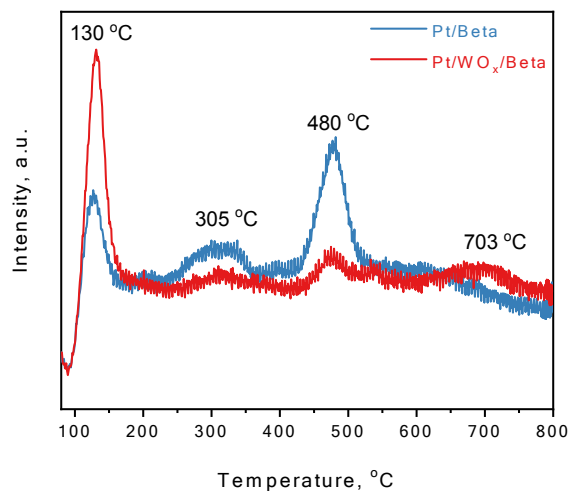

**Fig. S6** H<sub>2</sub> TPR curves of Pt/WO<sub>x</sub>/Beta and Pt/Beta catalyst.

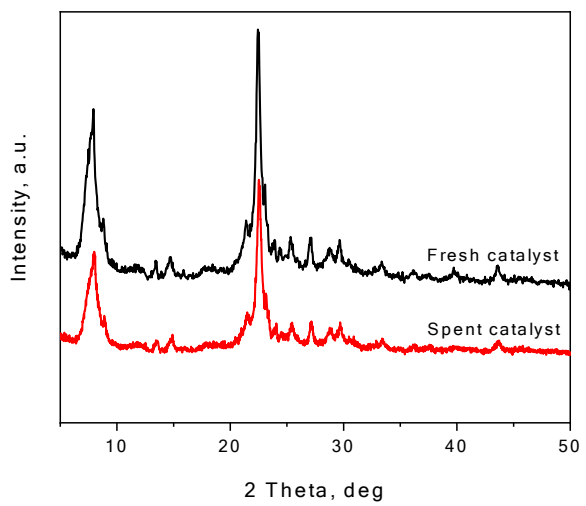

**Fig. S7** XRD patterns of fresh and spent Pt/WO<sub>x</sub>/Beta catalyst.

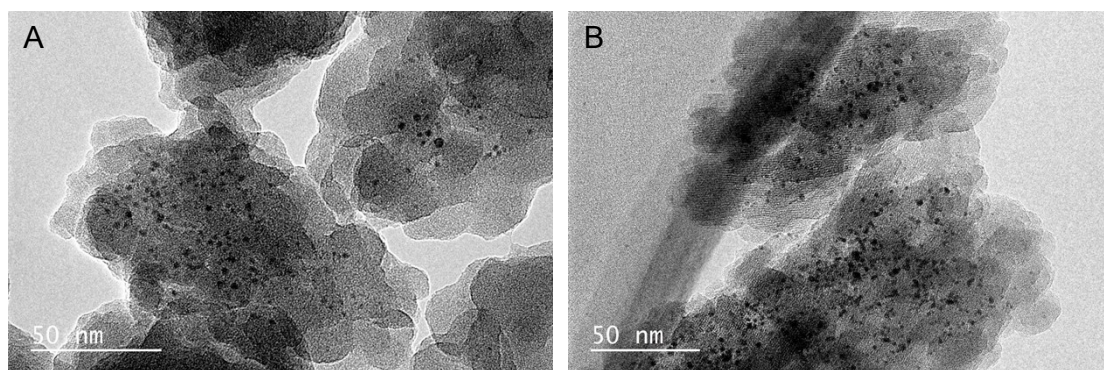

**Fig. S8** TEM images of A) fresh and B) spent Pt/WO<sub>x</sub>/Beta catalysts.



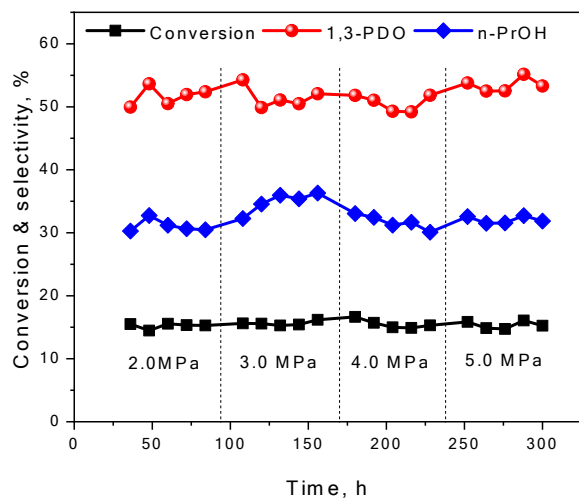

**Fig. S9** The effect of H<sub>2</sub> initial pressure on the glycerol conversion and product selectivity, reaction temperature: 160 °C, glycerol aqueous flow rate: 0.1 ml/min, glycerol concentration: 500 g/L.

## References

- 1 F. A. Braggio, M. D. Mello, B. C. Magalhães, J. L. Zotin and M. A. P. Silva, *Energ. Fuel* 2019, **33**, 1450–1457.
- 2 U. Nuravifah, S.-E. Putri, Y. Winbisono, Budhi and J. Rizkiana, *IOP Conf. Ser.: Mater. Sci. Eng.* 2019, **622**, 012024
